# Supplementary material for: Enhancing verapamil trace determination from biological matrices by bar adsorptive microextraction
Source: Royal Society of Chemistry journal article supplement (doi:10.1039/d4ay01171f), 2024-01-01
Supplement: d4ay01171f1.pdf [file d4ay01171f1.pdf]

## Supplementary material

### **Enhancing verapamil traces determination from biological matrices by bar adsorptive microextraction**

Camilla Fonseca Silva<sup>1,2</sup>, Mariana Foles Mendes<sup>2</sup>, José Manuel Flôrencio Nogueira<sup>2,\*</sup>, Keyller Bastos Borges<sup>1,\*</sup>

<sup>1</sup> Departamento de Ciências Naturais, Universidade Federal de São João del-Rei, Campus Dom Bosco, Praça Dom Helvécio 74, Fábricas, 36301-160, São João del-Rei, Minas Gerais, Brazil.

<sup>2</sup> Centro de Química Estrutural, Institute of Molecular Sciences, Departamento de Química e Bioquímica, Faculdade de Ciências, Universidade de Lisboa, Campo Grande, 1749-016 Lisboa, Portugal.

\*Corresponding author:

Prof. Keyller Bastos Borges, PhD, Departamento de Ciências Naturais, Universidade Federal de São João del-Rei, Campus Dom Bosco, Praça Dom Helvécio 74, Fábricas, 36301-160, São João del-Rei, Minas Gerais, Brazil

\*e-mail: [keyller@ufsj.edu.br](mailto:keyller@ufsj.edu.br)

Prof. José Manuel Florêncio Nogueira, PhD. Centro de Química Estrutural, Institute of Molecular Sciences, Departamento de Química e Bioquímica, Faculdade de Ciências, Universidade de Lisboa, Campo Grande, 1749-016 Lisboa, Portugal.

\*e-mail: [jmnogueira@ciencias.ulisboa.pt](mailto:jmnogueira@ciencias.ulisboa.pt)

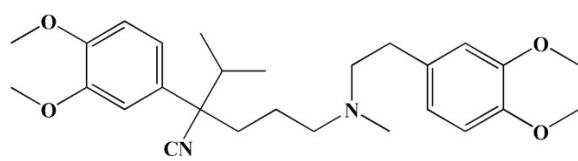

**Figure S1.** Chemical structure of the VER molecule.

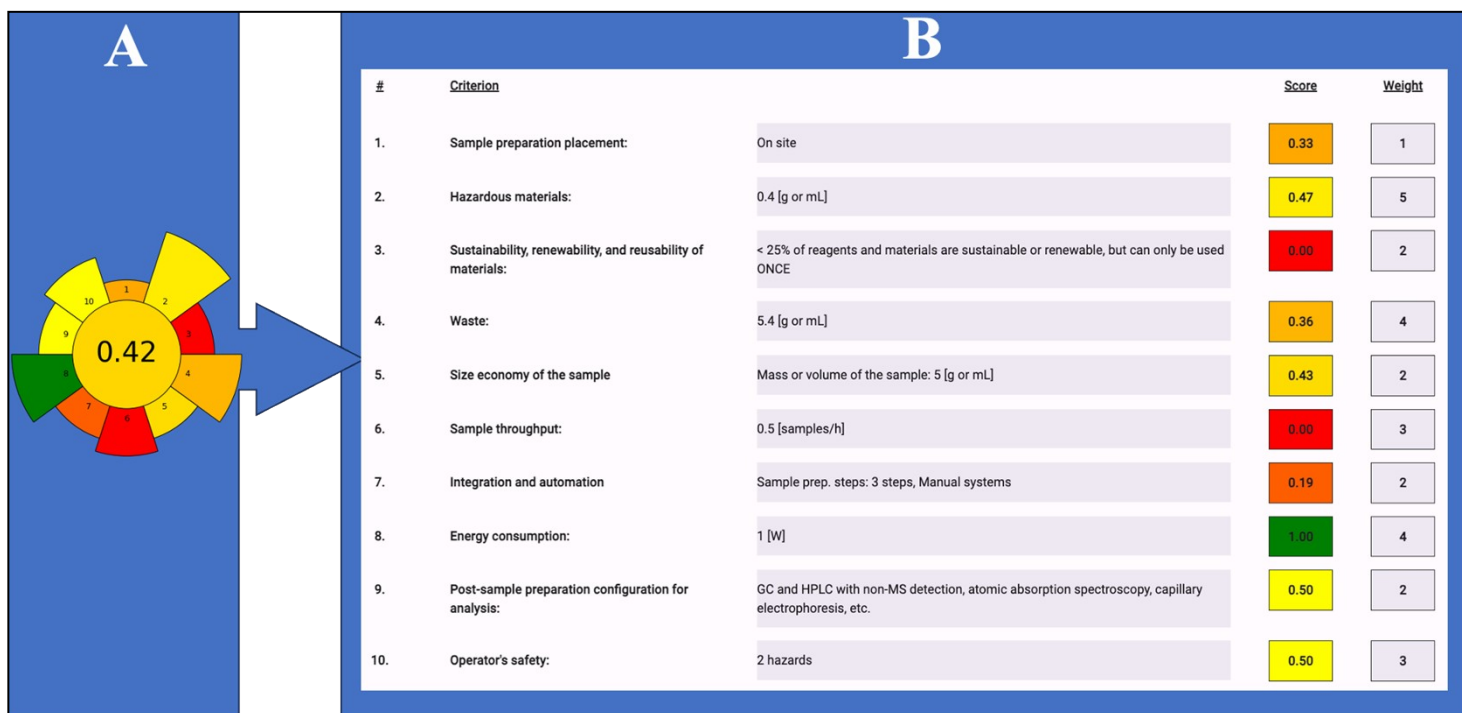

**Figure S2. (A)** Graphical results from the AGREEprep analysis calculated by emulator version *online*; **(B)** Criteria and data input for each subcategory with the final scores and weight employed for the BA $\mu$ E procedure.

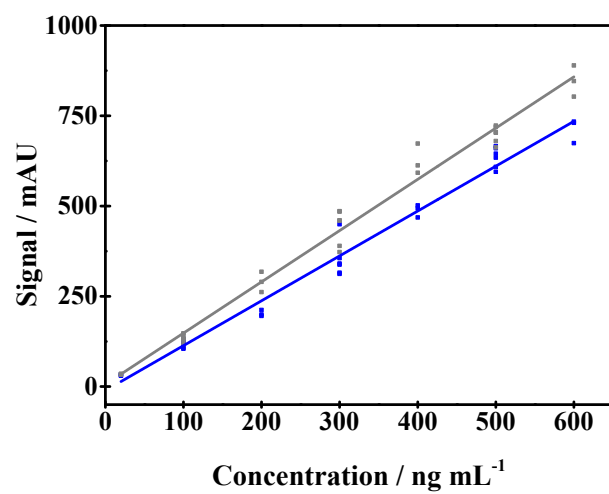

**Figure S3.** Analytical curves obtained for each method. In blue: STRATA-CN, in gray: ENVI-18.

**Table S1.** Main characteristics of the evaluated polymeric phases

| Commercial name | Chemical structure                                                                  | Separation mode                            | Type of analyte                     | Surface area (m <sup>2</sup> g <sup>-1</sup> ) | Particle size (μm) | Pore size (Å) |
|-----------------|-------------------------------------------------------------------------------------|--------------------------------------------|-------------------------------------|------------------------------------------------|--------------------|---------------|
| STRATA-CN       | 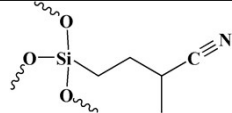   | Normal phase                               | More polar                          | 500                                            | 55                 | 70            |
| ENVI-18         |    | Reverse phase                              | More apolar                         | 475                                            | 45                 | 60            |
| Oasis HLB       |   | Reverse phase                              | Polar e apolar                      | 810                                            | 30                 | 80            |
| Oasis MAX       |  | Reverse phase and strong anionic exchange  | Acids                               | 830                                            | 30                 | 80            |
| Oasis WCX       |  | Reverse phase and strong cationic exchange | Bases (including quaternary amines) | 750                                            | 30                 | 80            |

**Table S2.** Precision and accuracy of the analytical methods

| <b>Method</b>                                          | <b>STRAT-CN</b> |            |            | <b>ENVI-18</b> |            |            |
|--------------------------------------------------------|-----------------|------------|------------|----------------|------------|------------|
| <b>Nominal concentration /<br/>ng mL<sup>-1</sup></b>  | <b>100</b>      | <b>300</b> | <b>500</b> | <b>100</b>     | <b>300</b> | <b>500</b> |
| <b>Intra-day / n<sup>a</sup> = 6</b>                   |                 |            |            |                |            |            |
| <b>Concentration analyzed /<br/>ng mL<sup>-1</sup></b> | 90.97           | 307.12     | 487.88     | 86.14          | 274.37     | 502.02     |
| <b>Precision / %RSD<sup>b</sup></b>                    | 7.35            | 11.06      | 3.32       | 9.08           | 14.36      | 4.45       |
| <b>Accuracy / %RE<sup>c</sup></b>                      | -9.03           | 2.38       | -2.42      | -13.87         | -8.54      | 0.40       |
| <b>Inter-day / n<sup>a</sup> = 6</b>                   |                 |            |            |                |            |            |
| <b>Concentration analyzed /<br/>ng mL<sup>-1</sup></b> | 94.33           | 296.47     | 502.91     | 93.62          | 292.50     | 492.72     |
| <b>Precision / %RSD<sup>b</sup></b>                    | 1.15            | 6.87       | 2.73       | 11.04          | 14.33      | 3.79       |
| <b>Accuracy / %RE<sup>c</sup></b>                      | -5.67           | -1.18      | 0.58       | -6.38          | -2.50      | -1.46      |

<sup>a</sup>n = number of repetitions; <sup>b</sup>%RSD = mean relative standard deviation; <sup>c</sup>%RE = mean relative error
